# Supplementary material
Source: PubMed Central journal article supplement (PMC4143008)
Supplement: 1405198111_pnas.201405198SI.pdf [file 1405198111_pnas.201405198SI.pdf]

# Supporting Information

Yan et al. 10.1073/pnas.1405198111

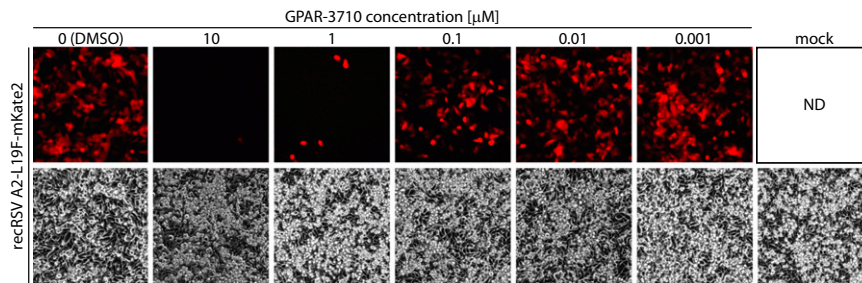

**Fig. S1.** Inhibition of recRSV A2-L19F-mKate2 by GPAR-3710. Phase contrast and fluorescence microphotographs of cells infected with recRSV A2-L19F-mKate2 in the presence of the specified compound concentrations or vehicle (DMSO) were taken 44 h after infection (p.i.).

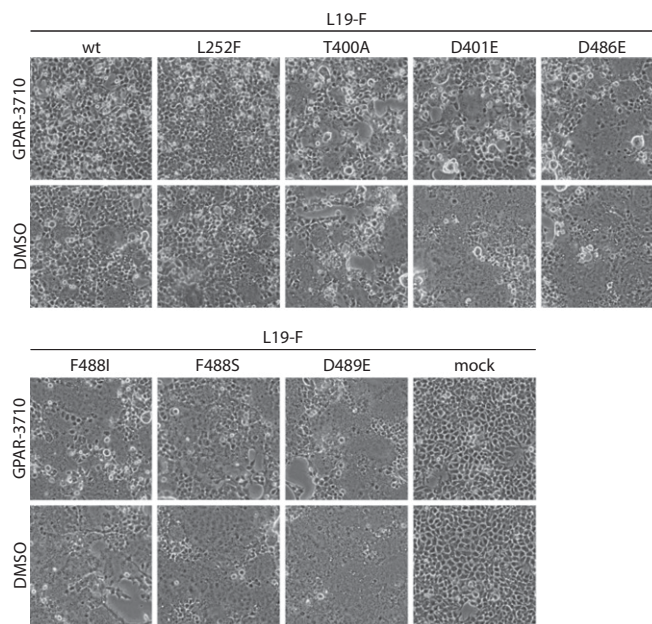

**Fig. S2.** Resistance testing of RSV F mutants harboring individual escape mutation candidates. Cells were transfected with expression plasmids encoding the specified L19-F mutants and incubated in the presence of 10  $\mu$ M GPAR-3710 or vehicle (DMSO). Microphotographs were taken 44 h p.i. Mock denotes cells that received vector DNA instead of F expression plasmid.

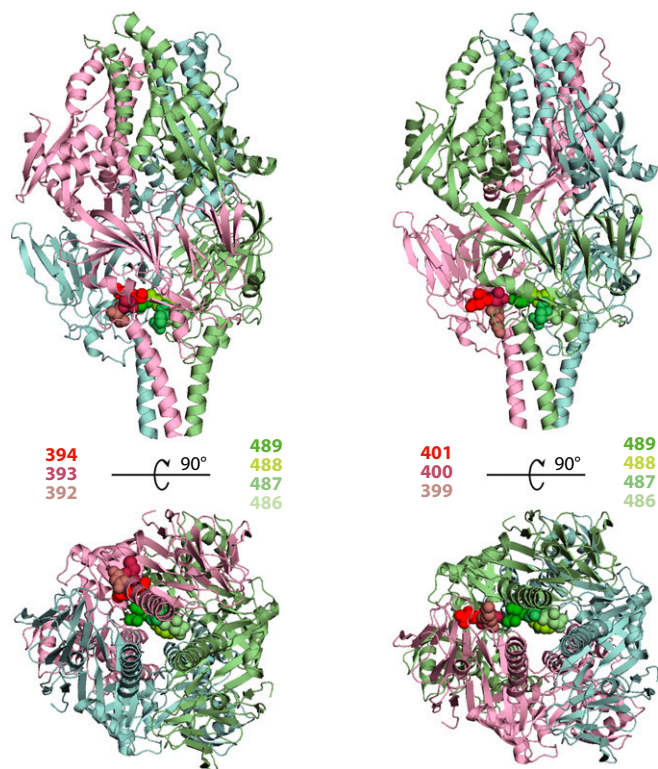

**Fig. S3.** Ribbon representations of RSV F in the prefusion conformation (PDB ID code 4JHW), colored by monomer. Solid spheres highlight the F 486–489 and F 392–394 (*Left*) or F 399–401 (*Right*) microdomains that were implicated in RSV escape from the diverse panel of entry inhibitors. For clarity of the illustration, the microdomains are highlighted in only one monomer each of the F trimer; note that residues 486–489 of different monomers are highlighted in the left and right panels. Side views and a view from the viral envelope up are shown.

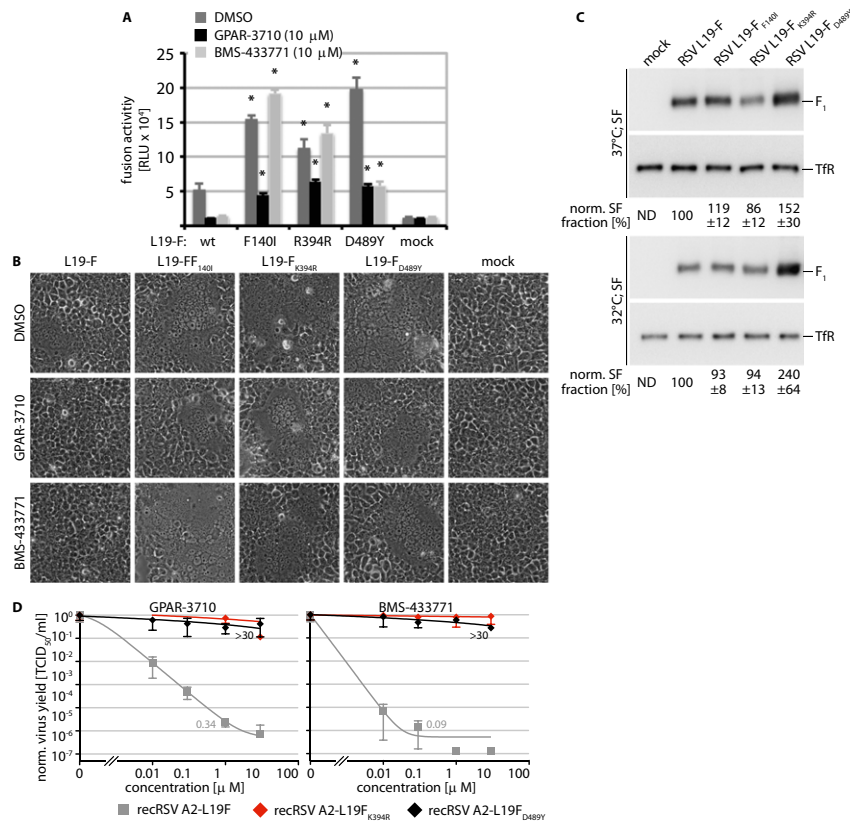

**Fig. 54.** Effect of escape mutations specifically reported for BMS-433771 on resistance to GPAR-3710 and the RSV F fusion kinetic. (A) Resistance quantification using transiently expressed RSV L19-F mutants as outlined for Fig. 3B. Values represent means of four experiments  $\pm$  SD. Datasets were subjected to one-way ANOVA and Bonferroni's multiple comparison posttest; asterisks indicate statistically significant differences of values obtained for individual mutants compared with equally treated, unmodified L19-F ( $P < 0.05$ ). Mock denotes cells transfected with vector DNA instead of F expression plasmid. (B) Microphotographs of Hep2 cells expressing unmodified L19-F or L19-F mutants and incubated in the presence of 10  $\mu$ M GPAR-3710, BMS-433771, or vehicle (DMSO). (C) Cell surface expression (SF) of transiently expressed RSV F mutants after incubation of cells at 37 °C or 32 °C. Blots were developed as described in Fig. 5D. Numbers denote mean densitometry quantifications of three experiments  $\pm$  SD, all normalized for TfR and expressed relative to standard L19-F. Mock denotes cells transfected with vector DNA instead of F expression plasmid. (D) Dose–response curves after recovery of recombinant RSV recRSV A2-L19F and recRSV A2-L19FD489Y against GPAR-3710 and BMS-433771. Values are mean normalized cell-associated viral titers of three experiments  $\pm$  SD. EC<sub>90</sub> concentrations were calculated as in Fig. 1C when applicable. Highest concentration assessed, 30  $\mu$ M.

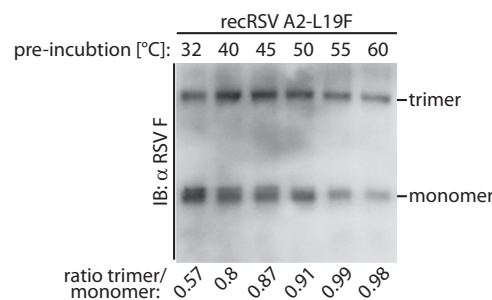

**Fig. 55.** Fusion core stability assay for RSV F. Purified viral particles were exposed to heat-shock at different temperatures for 10 min, followed by native extraction and fractionation through nonreducing TA-PAGE under mildly denaturing conditions as described in Fig. 6A. Immunoblots (IB) were probed with specific antibodies directed against the RSV F protein. The migration pattern of F monomers and fusion core-stabilized trimers is indicated. Numbers below the graph show the relative F trimer:F monomer ratio based on densitometric quantification of signal intensities.

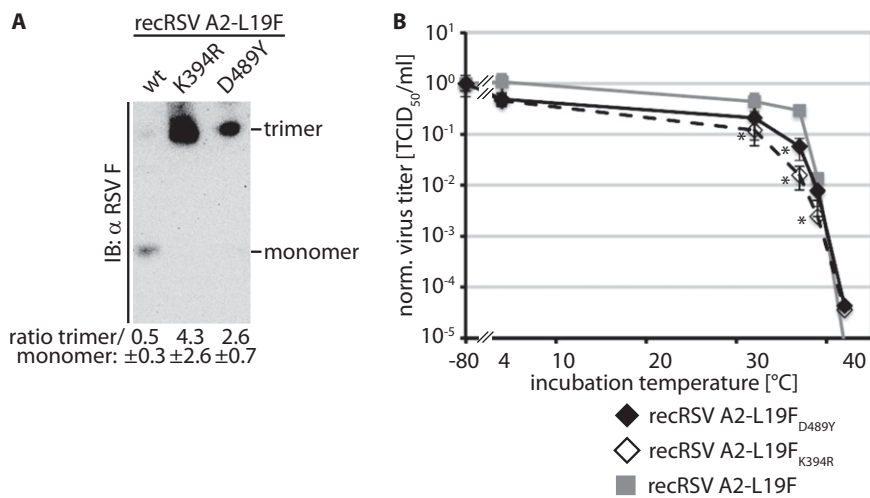

**Fig. 56.** Stability of RSV recombinants harboring resistance mutations specifically reported for BMS-433771. **(A)** Fusion core assay as described in Fig. 6A. The migration pattern of F monomers and fusion core-stabilized trimers is indicated; wt, standard L19F. Numbers below the graph show the mean relative F trimer:F monomer ratio based on densitometric quantification of signal intensities of four experiments  $\pm$  SD. **(B)** Thermal stability of resistant RSV virions as described in Fig. 6B. Values were normalized for aliquots immediately stored at  $-80^\circ\text{C}$  for 24 h, and represent means of three experiments  $\pm$  SD. Asterisks denote statistical analysis of differences between test groups and standard recRSV A2-L19F by one-way ANOVA and Bonferroni's multiple comparison posttest;  $*P < 0.05$ .

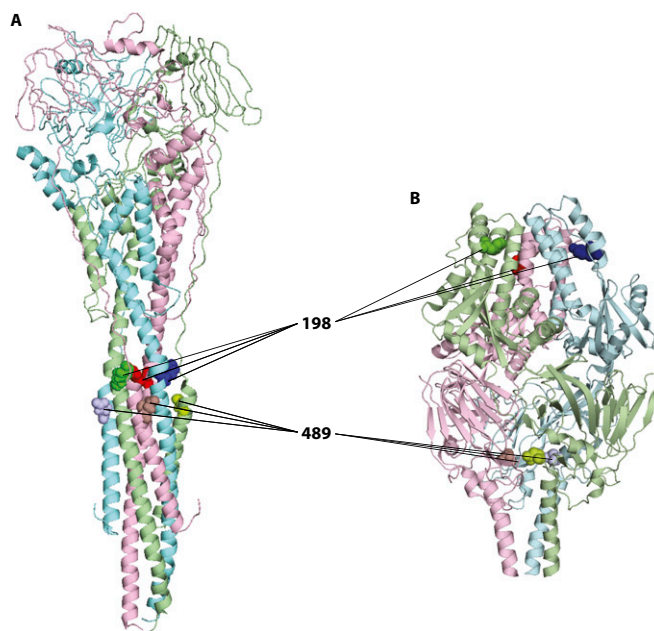

**Fig. 57.** Ribbon representations of RSV F in the postfusion (**A**; PDB ID code 3RRT) and prefusion (**B**; PDB ID code 4JHW) conformation, colored by monomer. Solid spheres represent for each monomer amino acid side chains at positions 198 and 489, respectively. Side views are shown.

**Table S1. Overview of different chemical classes of highly potent RSV entry inhibitors for which resistance hotspots have been mapped**

| Name       | Structure | EC <sub>50</sub> * | Reported resistance sites <sup>†</sup>                                                                                           | Source     |
|------------|-----------|--------------------|----------------------------------------------------------------------------------------------------------------------------------|------------|
| GPAR-3710  |           | 0.13 μM            | F <sub>T400A</sub><br>F <sub>D401E</sub><br>F <sub>D486E</sub><br>F <sub>F488I</sub><br>F <sub>F488S</sub><br>F <sub>D489E</sub> | This study |
| TMC353121  |           | 0.13 nM            | F <sub>K394R</sub><br>F <sub>S398L</sub><br>F <sub>D486N</sub>                                                                   | 1          |
| JNJ2408068 |           | 2.1 nM             | F <sub>K399I</sub><br>F <sub>D486N</sub><br>F <sub>E487D</sub>                                                                   | 2          |
| VP-14637   |           | 1.4 nM             | F <sub>T400A</sub><br>F <sub>F488Y</sub>                                                                                         | 2          |
| BMS-433771 |           | 10 nM              | F <sub>F140I</sub><br>F <sub>V144A</sub><br>F <sub>D392G</sub><br>F <sub>K394R</sub><br>F <sub>D489Y</sub>                       | 3          |
| R170591    |           | 2 nM               | F <sub>F488I</sub><br>F <sub>F488L</sub><br>F <sub>D489Y</sub>                                                                   | 4          |

\*Active concentrations are based on in vitro assays; numbers refer, when available, to the RSV A2 strain.

<sup>†</sup>Resistance sites in the RSV F protein: Mutations highlighted in red map to the F 400 micro-domain; changes in blue affect the F 489 region.

1. Roymans D, et al. (2010) Binding of a potent small-molecule inhibitor of six-helix bundle formation requires interactions with both heptad-repeats of the RSV fusion protein. *Proc Natl Acad Sci USA* 107(1):308–313.
2. Douglas JL, et al. (2005) Small molecules VP-14637 and JNJ-2408068 inhibit respiratory syncytial virus fusion by similar mechanisms. *Antimicrob Agents Chemother* 49(6):2460–2466.
3. Cianci C, et al. (2004) Orally active fusion inhibitor of respiratory syncytial virus. *Antimicrob Agents Chemother* 48(2):413–422.
4. Morton CJ, et al. (2003) Structural characterization of respiratory syncytial virus fusion inhibitor escape mutants: Homology model of the F protein and a syncytium formation assay. *Virology* 311(2):275–288.
